# Supplementary material for: Freeze–thaw processes correspond to the protection–loss of soil organic carbon through regulating pore structure of aggregates in alpine ecosystems
Source: Copernicus journal article supplement (doi:10.5194/soil-10-859-2024), 2024-12-04
Supplement: Supplementary file 1 [file soil-10-859-2024-supplement.pdf]

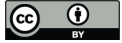

*Supplement of*

**Freeze–thaw processes correspond to the protection–loss of soil organic carbon through regulating pore structure of aggregates in alpine ecosystems**

**Ruizhe Wang and Xia Hu**

*Correspondence to:* Xia Hu ([huxia@bnu.edu.cn](mailto:huxia@bnu.edu.cn))

The copyright of individual parts of the supplement might differ from the article licence.

Table S1 Basic soil physio-chemical properties

| Ecosystem          | Soil depth (cm) | Bulk density (g/cm <sup>3</sup> ) | Soil water content (%) | pH      | Organic C (g/kg) | Total N (g/kg) | Particle size composition (%) |            |             |
|--------------------|-----------------|-----------------------------------|------------------------|---------|------------------|----------------|-------------------------------|------------|-------------|
|                    |                 |                                   |                        |         |                  |                | clay                          | silt       | sand        |
| KPM<br>(meadow)    | 0-10            | 0.77±0.                           | 35.76±1                | 6.50±0. | 85.26±2          | 7.66±2.        | 9.05±2.6                      | 33.60±6.10 | 57.35±8.73  |
|                    |                 | 19b                               | 5.01                   | 35      | 9.38a            | 22a            | 5                             |            |             |
|                    | 10-30           | 1.00±0.                           | 32.00±2                | 6.49±0. | 67.12±2          | 6.94±1.        | 10.65±3.                      | 35.83±9.05 | 53.52±12.64 |
|                    |                 | 17a                               | 0.68                   | 19      | 0.49ab           | 37ab           | 74                            |            |             |
|                    | 30-50           | 1.07±0.                           | 24.18±1                | 7.17±0. | 25.35±6          | 2.66±0.        | 11.84±2.                      | 34.88±4.98 | 53.28±7.32  |
|                    |                 | 05a                               | 3.04                   | 32      | .78b             | 45b            | 57                            |            |             |
| PFS<br>(shrubland) | 0-10            | 0.83±0.                           | 42.57±4                | 6.64±0. | 64.42±1          | 7.00±1.        | 13.95±0.                      | 47.56±1.25 | 38.49±1.69  |
|                    |                 | 23                                | .57a                   | 40      | 1.22a            | 12a            | 56                            |            |             |
|                    | 10-30           | 0.81±0.                           | 32.40±8                | 6.82±0. | 44.11±6          | 4.30±0.        | 14.59±0.                      | 46.85±1.00 | 38.56±1.73  |
|                    |                 | 15                                | .70ab                  | 22      | .88ab            | 90ab           | 86                            |            |             |
|                    | 30-50           | 0.96±0.                           | 22.82±0                | 7.31±0. | 36.44±7          | 3.38±0.        | 15.05±1.                      | 47.44±3.80 | 37.50±5.58  |
|                    |                 | 15                                | .50a                   | 37      | .06b             | 53b            | 80                            |            |             |

**Note:** KPM-*Kobresia pygmaea* meadow; PFS- *Potentilla fruticosa* shrub. The properties were measured with samples taken in the unstable freezing period. All data is presented with standard error (n=3). Different lowercase letters denote significant difference between soil layers.

Table S2 Mass proportions of soil aggregates in alpine ecosystems during the seasonal freeze–thaw process

| Ecosystem          | Aggregate fraction | Mass proportion of aggregates (%) |              |              |               |
|--------------------|--------------------|-----------------------------------|--------------|--------------|---------------|
|                    |                    | UFP                               | SFP          | UTP          | STP           |
| KPM<br>(meadow)    | > 2 mm             | 34.55±6.80ab                      | 41.14±11.36a | 29.83±8.72b  | 38.86±12.90ab |
|                    | 0.25-2 mm          | 46.29±5.60a                       | 37.29±7.77b  | 48.73±6.86a  | 42.97±11.81ab |
|                    | 0.053-0.25 mm      | 16.61±3.64                        | 16.73±5.73   | 20.27±4.32   | 15.56±5.09    |
|                    | <0.053 mm          | 2.55±0.80a                        | 4.84±2.74a   | 1.16±0.81b   | 2.61±1.61ab   |
| PFS<br>(shrubland) | > 2 mm             | 32.17±5.49                        | 34.52±13.59  | 26.57±6.66   | 30.03±8.52    |
|                    | 0.25-2 mm          | 47.30±5.80a                       | 35.40±6.50b  | 51.72±8.65a  | 45.02±7.17a   |
|                    | 0.053-0.25 mm      | 18.07±3.28b                       | 22.50±7.40a  | 18.72±4.28ab | 21.00±7.10ab  |
|                    | <0.053 mm          | 2.49±1.62ab                       | 7.75±3.50a   | 2.92±2.16b   | 3.95±3.52ab   |

Note: Bars represent the mean ± standard error (n=9). Uppercase letters represent significant differences among FT periods (P<0.05).

10 Table S3 Correlations between SOC content and soil structure of soil aggregates in freezing period and thawing period

| Thawing period  |          |                     |             |                           |                     |                   |               |                 |         |               |
|-----------------|----------|---------------------|-------------|---------------------------|---------------------|-------------------|---------------|-----------------|---------|---------------|
|                 | Porosity | Equivalent diameter | Mean volume | Pore surface area density | Pore length density | Pore shape factor | Pd<15         | Pd15-30         | Pd30-80 | Pd>80         |
| TOC             | 0.428    | -0.404              | -0.124      | 0.553                     | <b>0.718*</b>       | 0.241             | 0.420         | 0.084           | 0.316   | -0.235        |
| POC             | 0.222    | -0.252              | 0.188       | 0.339                     | 0.397               | 0.032             | <b>0.639*</b> | 0.123           | 0.410   | -0.273        |
| MAOC            | 0.529    | -0.443              | -0.479      | <b>0.622*</b>             | <b>0.865**</b>      | 0.422             | 0.013         | 0.010           | 0.086   | -0.106        |
| Freezing period |          |                     |             |                           |                     |                   |               |                 |         |               |
|                 | Porosity | Equivalent diameter | Mean volume | Pore surface area density | Pore length density | Pore shape factor | Pd<15         | Pd15-30         | Pd30-80 | Pd>80         |
| TOC             | 0.582    | -0.507              | -0.036      | 0.326                     | 0.396               | 0.199             | <b>0.811*</b> | <b>-0.834**</b> | -0.503  | <b>0.733*</b> |
| POC             | 0.521    | -0.214              | -0.274      | 0.178                     | 0.428               | 0.538             | 0.458         | -0.353          | -0.146  | 0.295         |
| MAOC            | 0.409    | -0.498              | 0.117       | 0.296                     | 0.234               | 0.071             | <b>0.727*</b> | <b>-0.818*</b>  | -0.532  | <b>0.727*</b> |

Note: \* represents the correlation is significant ( $P < 0.05$ ). Pd<15: volume percentage of pores <15  $\mu\text{m}$ , Pd15-30: volume percentage of pores 15-30  $\mu\text{m}$ ; Pd30-80: volume percentage of pores 30-80  $\mu\text{m}$ ; Pd>80: volume percentage of pores >80  $\mu\text{m}$ .
